# Supplementary material for: Jian-Pi-Yi-Shen formula alleviates renal fibrosis by restoring NAD+ biosynthesis in vivo and in vitro
Source: Aging (Albany NY). 2023 Dec 28;16(1):106–28. doi: 10.18632/aging.205352 (PMC10817388; doi:10.18632/aging.205352)
Supplement: Supplementary Figures [file aging-16-205352-s002.pdf]

## SUPPLEMENTARY FIGURES

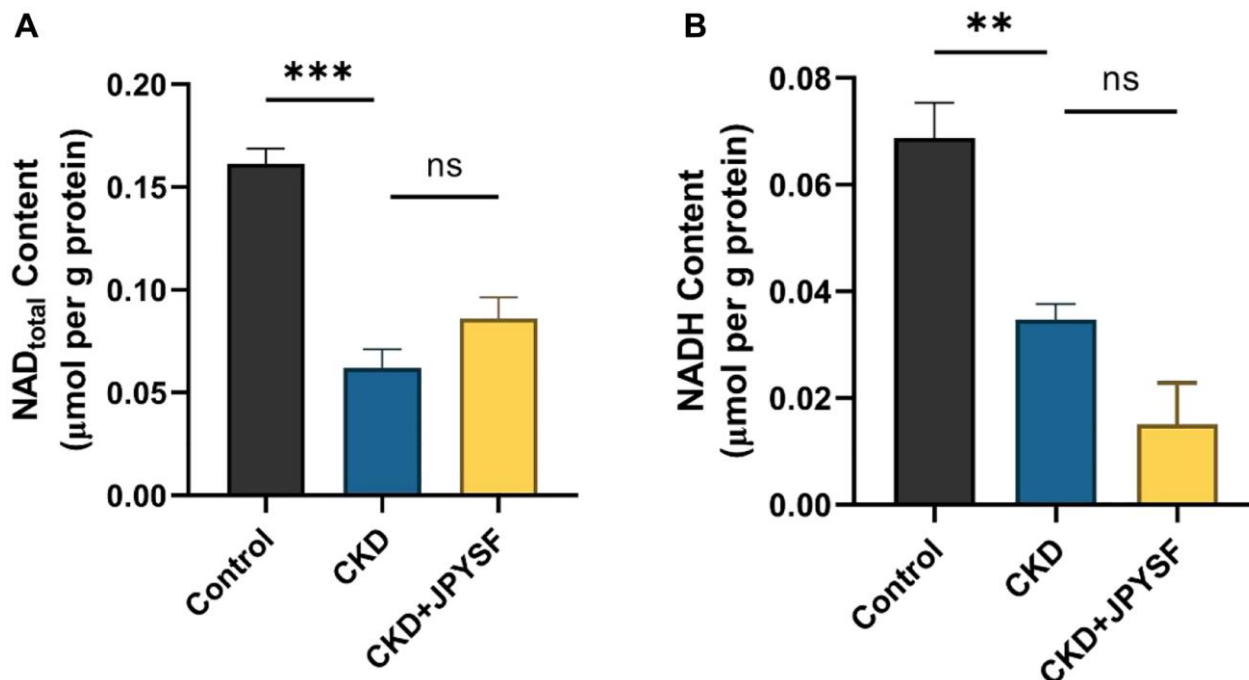

**Supplementary Figure 1.** NAD<sub>total</sub> and NADH content in the kidney of normal mice and CKD mice with or without JPYSF treatment. (A) NAD<sub>total</sub> content ( $n = 4$ ). (B) NADH content ( $n = 4$ ). Data are expressed as mean  $\pm$  SEM (\*\* $p < 0.01$ , \*\*\* $p < 0.001$  between the indicated two groups).

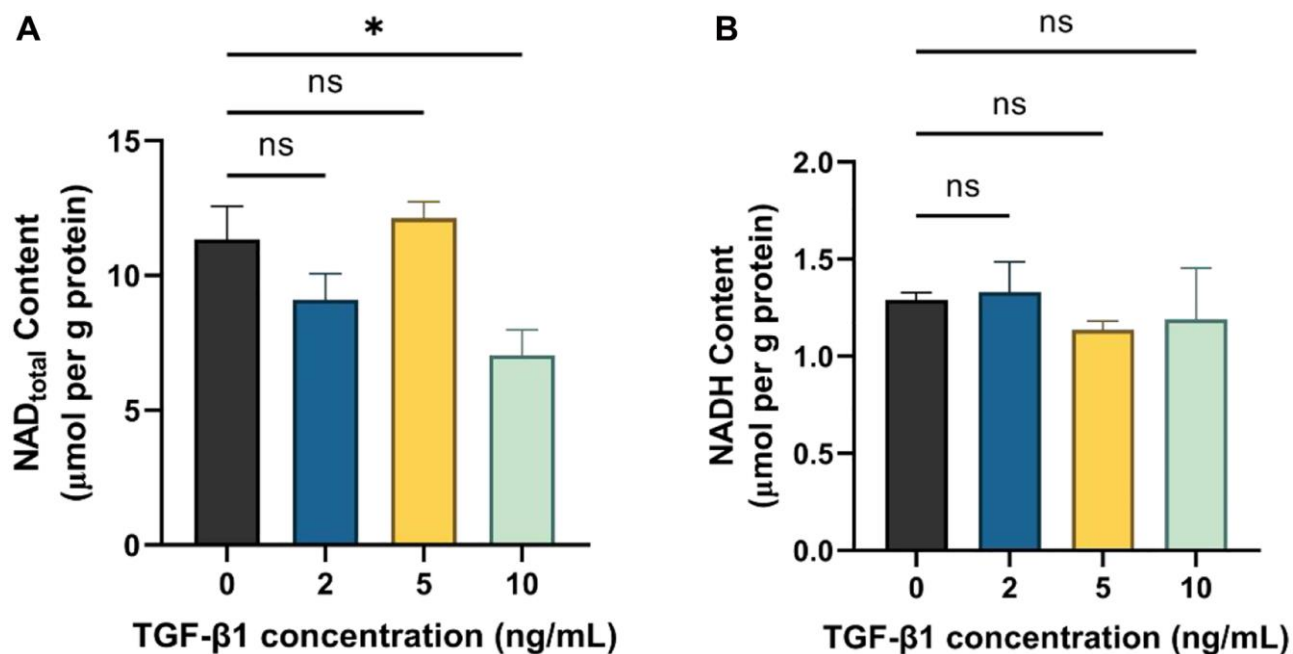

**Supplementary Figure 2.** NAD<sub>total</sub> and NADH content in HK-2 cells stimulated with TGF-β1 at the concentrations of 0, 2, 5, and 10 ng/mL. (A) NAD<sub>total</sub> content ( $n = 3$ ). (B) NADH content ( $n = 3$ ). Data are expressed as mean  $\pm$  SEM (\* $p < 0.05$  between the indicated two groups).

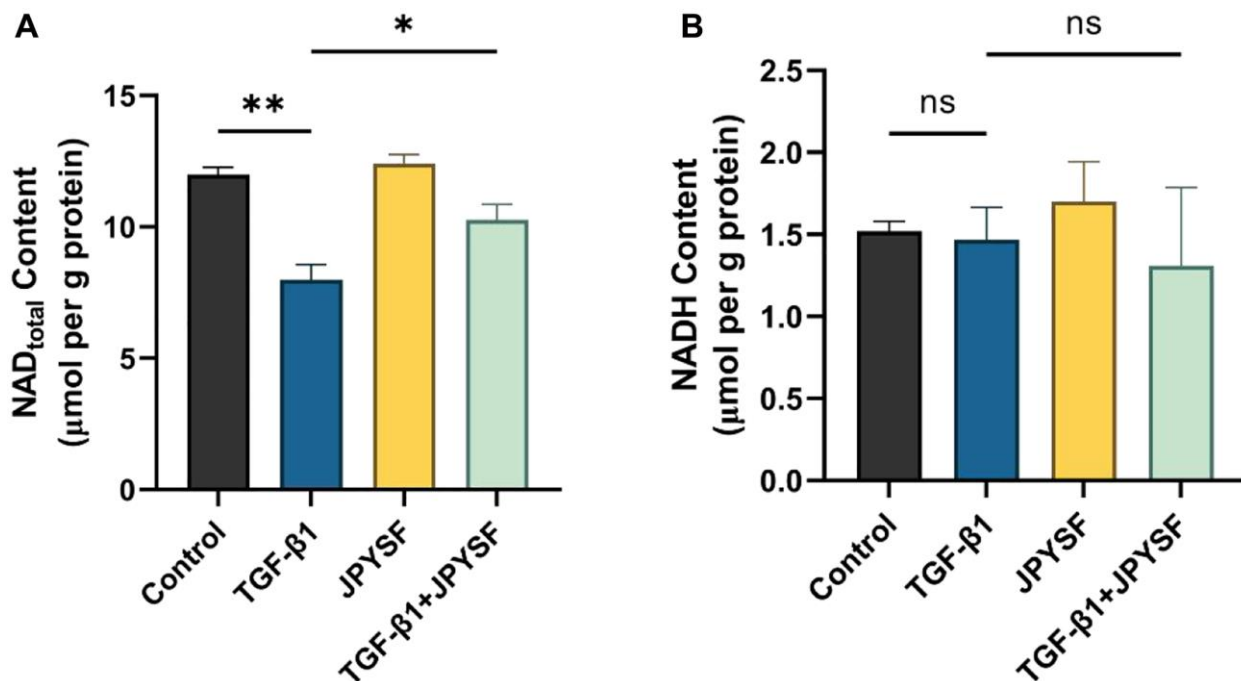

**Supplementary Figure 3.** NAD<sub>total</sub> and NADH content in HK-2 cells with TGF-β1 or/and JPYSF stimulation. (A) NAD<sub>total</sub> content ( $n = 3$ ). (B) NADH content ( $n = 3$ ). Data are expressed as mean  $\pm$  SEM ( $*p < 0.05$  between the indicated two groups).

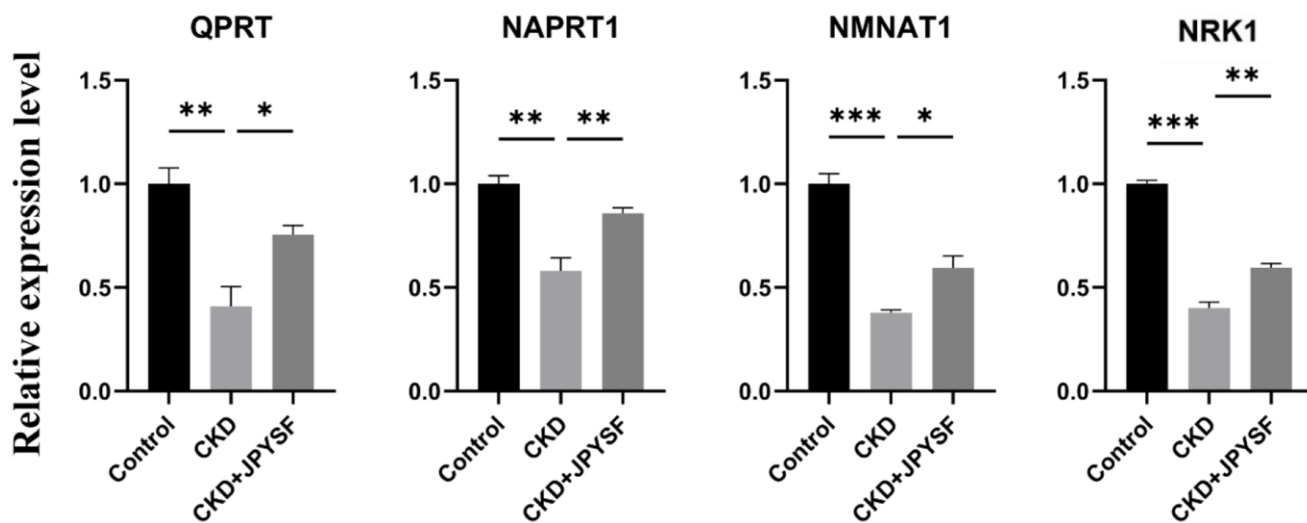

**Supplementary Figure 4.** NAD<sup>+</sup> biosynthesis-related enzymes in mouse kidney were analyzed by qPCR ( $n = 3$ ). Data are expressed as mean  $\pm$  SEM ( $*p < 0.05$ ,  $**p < 0.01$ ,  $***p < 0.001$  between the indicated two groups).

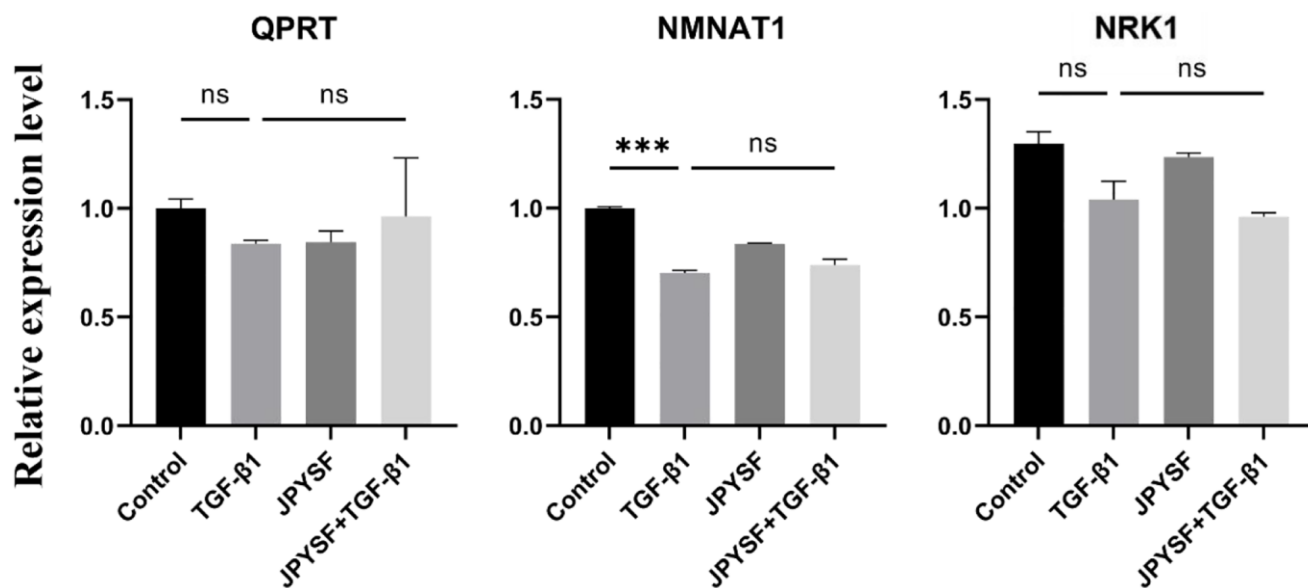

Supplementary Figure 5. NAD<sup>+</sup> biosynthesis-related enzymes in HK-2 cells with TGF-β1 or/and JPYSF stimulation were analyzed by qPCR ( $n = 2\sim3$ ). Data are expressed as mean  $\pm$  SEM (\*\*\*)  $p < 0.001$  between the indicated two groups).
